# Supplementary material
Source: PubMed Central journal article supplement (PMC3787564)
Supplement: 309816.f1.pdf [file 309816.f1.pdf]

## Supplementary Figures (1, 2 & 3)

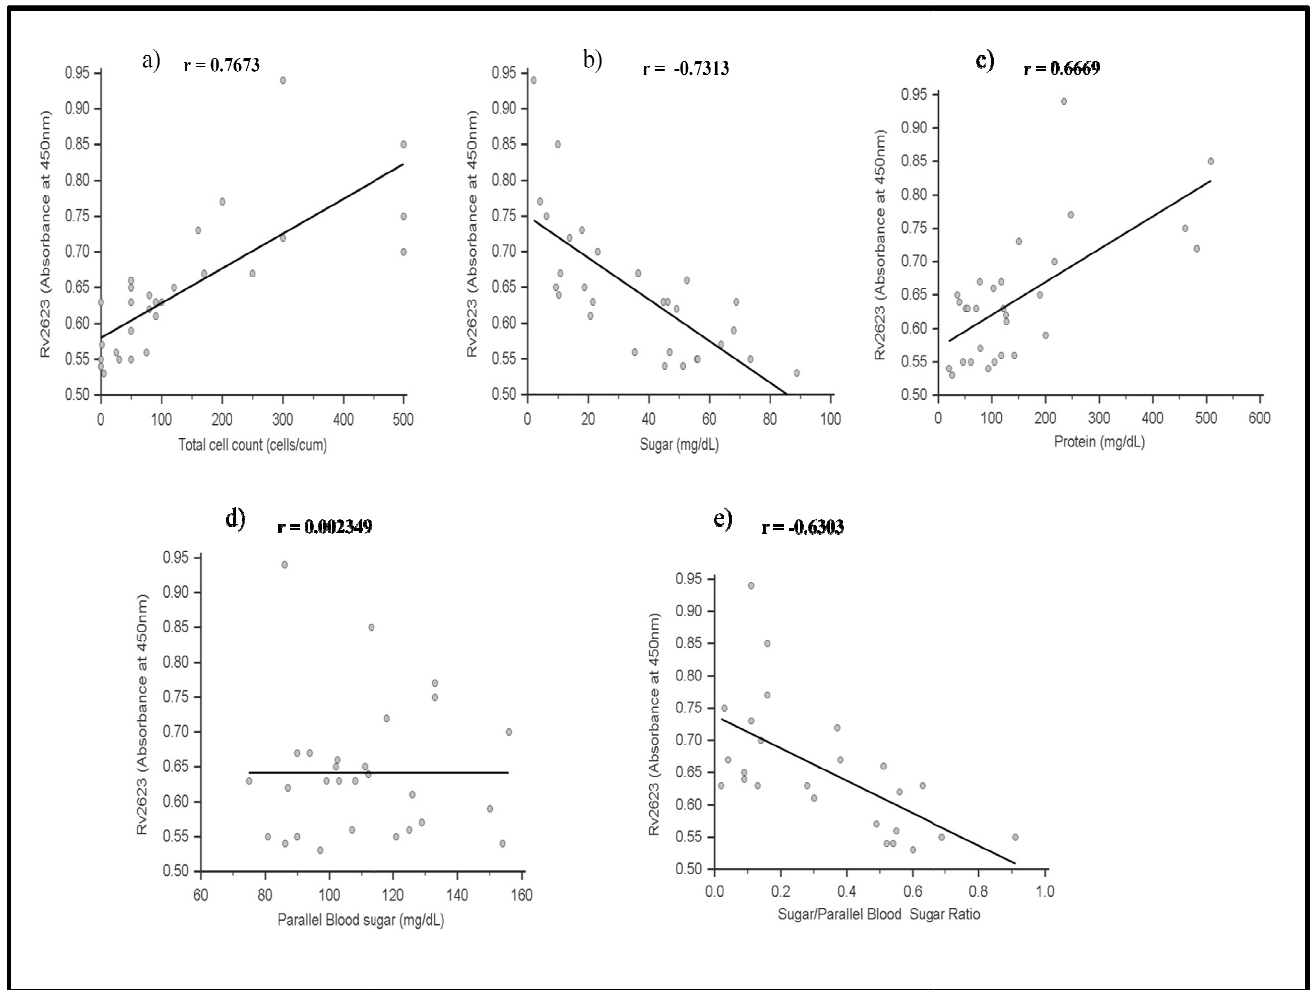

**Supplementary Figure 1:** Correlation between Rv2623 absorbance level and different CSF readouts a) total cell count, b) Sugar c) protein d) Parallel blood sugar e) Sugar /Parallel blood sugar ratio in samples of active TBM patients.

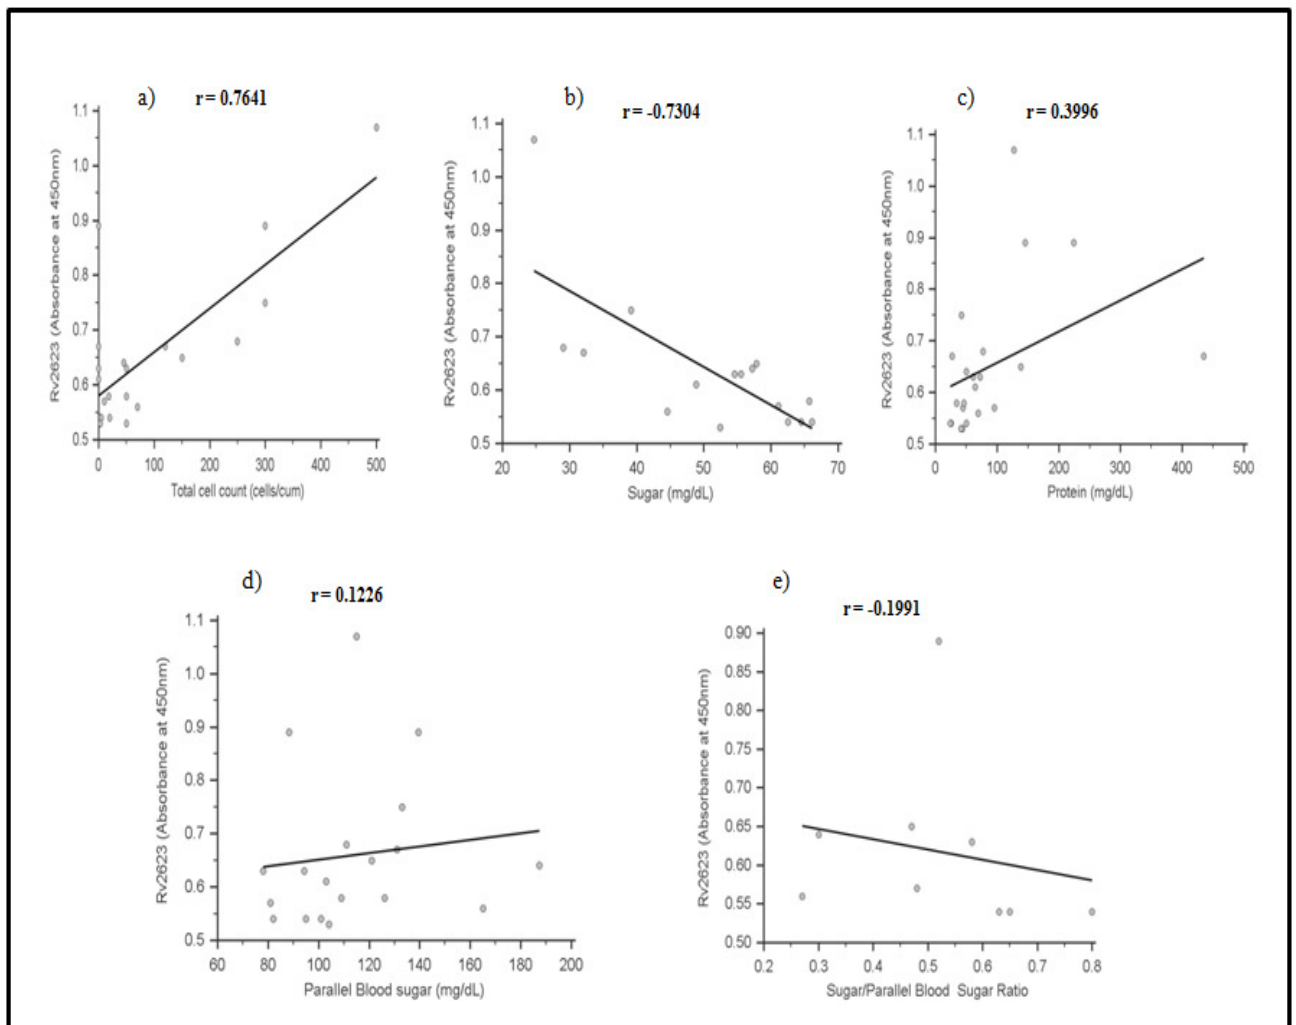

**Supplementary Figure 2:** Correlation between Rv2623 absorbance level and different CSF readouts a) total cell count, b) Sugar c) protein d) Parallel blood sugar e) Sugar /Parallel blood sugar ratio in samples of suspected Latent TBM patients.

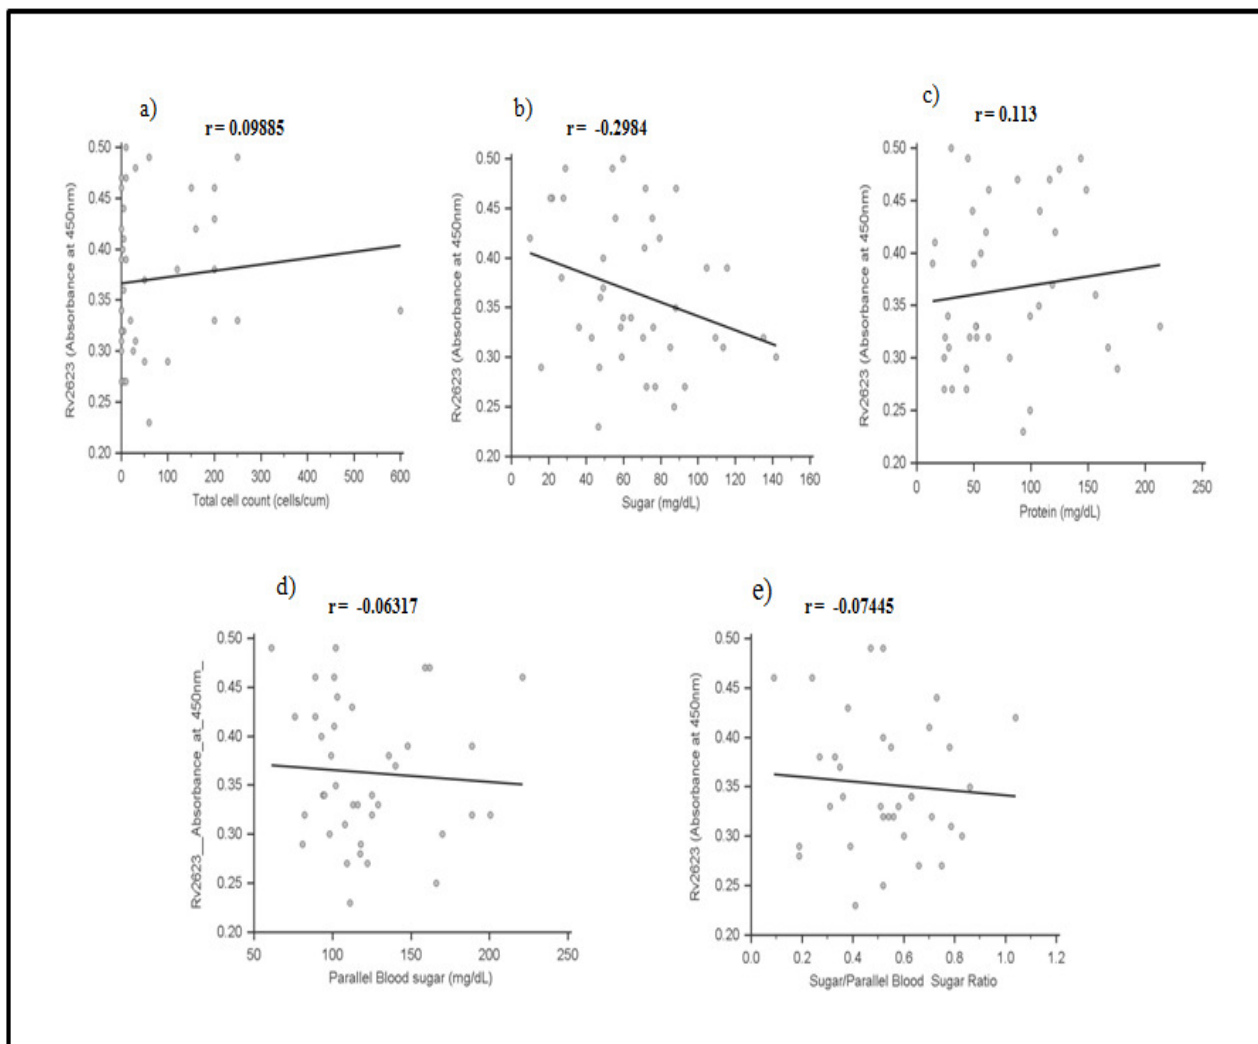

**Supplementary Figure 3:** Correlation between Rv2623 absorbance level and different CSF readouts a) total cell count, b) Sugar c) protein d) Parallel blood sugar e) Sugar /Parallel blood sugar ratio in samples of non TBM control patients.
